# Supplementary material for: CRISPR/Cas9-targeted mutagenesis of the tomato susceptibility gene PMR4 for resistance against powdery mildew
Source: PubMed Central journal article supplement (PMC7304142; doi:10.1186/s12870-020-02497-y), 2020-06-19

## A Alignment of sequences of PCR product Fw2969+Rv4230 of MM and CRISPR PMR4 events

|        |                                                               |
|--------|---------------------------------------------------------------|
|        | <b>Fw2969→</b>                                                |
| MM     | tagagaaggaatggttgatgagaagaagagttatggactacaaagctaagggatcttcg   |
| Event1 | tagagaaggaatggttgatgagaagaagagttatggactacaaagctaagggatcttcg   |
| Event2 | tagagaaggaatggttgatgagaagaagagttatggactacaaagctaagggatcttcg   |
| Event3 | tagagaaggaatggttgatgagaagaagagttatggactacaaagctaagggatcttcg   |
| Event4 | tagagaaggaatggttgatgagaagaagagttatggactacaaagctaagggatcttcg   |
| Event5 | tagagaaggaatggttgatgagaagaagagttatggactacaaagctaagggatcttcg   |
| MM     | tctttgggcatcatacagagggcagactcttactcgcacggttaggggatgatgtacta   |
| Event1 | tctttgggcatcatacagagggcagactcttactcgcacggttaggggatgatgtacta   |
| Event2 | tctttgggcatcatacagagggcagactcttactcgcacggttaggggatgatgtacta   |
| Event3 | tctttgggcatcatacagagggcagactcttactcgcacggttaggggatgatgtacta   |
| Event4 | tctttgggcatcatacagagggcagactcttactcgcacggttaggggatgatgtacta   |
| Event5 | tctttgggcatcatacagagggcagactcttactcgcacggttaggggatgatgtacta   |
|        | <b>sgRNA8→</b>                                                |
| MM     | ctatcgagctctcaaaatgctggcctttctggattctgcttgtagatggatatcagaga   |
| Event1 | ctatcgagctctcaaaatgctggcctttctggattctgcttgtagatggatatcagaga   |
| Event2 | ctatcgagctctcaaaatgctggcctttctggattctgcttgtagatggatatcagag-   |
| Event3 | ctatcgagctctcaaaatgctggcctttctggattctgcttgtagatggatatcagaga   |
| Event4 | ctatcgagctctcaaaatgctggcctttctggattctgcttgtagatggatatcaga-    |
| Event5 | ctatcgagctctcaaaatgctggcctttctggattctgcttgtagatggatatcagaga   |
|        | <b>PAM</b>                                                    |
| MM     | aggatcagtggaacttggttctatgaggcatgatgatagcattggtggttaagtccaga   |
| Event1 | -----                                                         |
| Event2 | ----tcagtggaacttggttctatgaggcatgatgatagcattggtggttaagtccaga   |
| Event3 | aggatca-----                                                  |
| Event4 | -----                                                         |
| Event5 | aggatggcaaccttggttcaaacatagatatctgattcaaccaaacatcccttccttt    |
| MM     | aagatctcagtccttcgaggaggttgagttagagctgacagttcagtgagtatggtgttaa |
| Event1 | -----                                                         |
| Event2 | aagatctcagtccttcgaggaggttgagttagagctgacagttcagtgagtatggtgttaa |
| Event3 | -----                                                         |
| Event4 | -----                                                         |
| Event5 | gccaacttgatatatactcatggtgagtgacattgccacctgtaatgtacagttgaagcc  |
|        | <b>PAM ←sgRNA1</b>                                            |
| MM     | aggccacgagtatgggactgctttaatgaaattcacatatgtggttagcttgtcagatata |
| Event1 | -----                                                         |
| Event2 | aggccacgagtatgggactgctttaatgaaattcacatatgtggttagcttgtcagatata |
| Event3 | -----                                                         |
| Event4 | -----                                                         |
| Event5 | agcaaaaatgtcctcgctgatggtgatcactttagatgccttgcttattcctccctagt   |
| MM     | tggggctcagaaggccaaaaaagatccacatgcagaggaaatgttatctgatgaaaaa    |
| Event1 | -----                                                         |
| Event2 | tggggctcagaaggccaaaaaagatccacatgcagaggaaatgttatctgatgaaaaa    |
| Event3 | -----                                                         |
| Event4 | -----                                                         |
| Event5 | tagaaacaaaacctgtcaatacatctggatgtccataatgcattcggattttcagggg    |

MM taatgaagctcttcgtagcttatggtgatgaggttcccacaggaagggatgagaagga  
Event1 -----  
Event2 taatgaagctcttcgtagcttatggtgatgaggttcccacaggaagggatgagaagga  
Event3 -----  
Event4 -----  
Event5 **gttggctaatacacgctgtcctagggttacaaaactcatttctgagctgacatgaacca**

MM ttattattctgtgcttgtgaagatgatcaaaaacttgaaaggaagttgagatctatcg  
Event1 -----  
Event2 ttattattctgtgcttgtgaagatgatcaaaaacttgaaaggaagttgagatctatcg  
Event3 -----  
Event4 -----  
Event5 **agcaagggatgacacggaaccagtaaatatagtctcgaactccaagaatcgtaggttt**

MM agttaagttgctggtcctttgaagcttggggaggggaaaccagaaaatcaaaatcatgc  
Event1 -----  
Event2 agttaagttgctggtcctttgaagcttggggaggggaaaccagaaaatcaaaatcatgc  
Event3 -----  
Event4 -----  
Event5 **gcgaataccatagtagagtttgaattcttccaacaagttcctcattttcagtgcctctc**

MM ctttatctttaccggtgtagcagttcagactattgacatgaaccaagataattactt  
Event1 -----  
Event2 ctttatctttaccggtgtagcagttcagactattgacatgaaccaagataattactt  
Event3 -----  
Event4 -----  
Event5 **aaagtaattatcttggttcatgtcaatagttctgaactgcaccacgggtaaagataaa**

MM tgaggaggcactgaaaatgaggaacttgttggagaattcaaactctactatggtattcg  
Event1 -----  
Event2 tgaggaggcactgaaaatgaggaacttgttggagaattcaaactctactatggtattcg  
Event3 -----  
Event4 -----  
Event5 **ggcatgattttgattttctggttccoctcccaagcttcaaaggaccaggcaacttaac**

MM caaacctacgattcttggagttcgagaacatatatttactggttccgtgtcatcccttgc  
Event1 -----  
Event2 caaacctacgattcttggagttcgagaacatatatttactggttccgtgtcatcccttgc  
Event3 -----  
Event4 -----  
Event5 **tcgatagatctcaacttccctttcaagttttgatcacttcaagcacagaataata**

MM ttggttcagtcagctcaggaaatgagttttgtaaccctaggacagcgtgtattagccaa  
Event1 -----  
Event2 ttggttcagtcagctcaggaaatgagttttgtaaccctaggacagcgtgtattagccaa  
Event3 -----  
Event4 -----  
Event5 **atccttctcatcccttctgtgggaacctcatcaacataagctacacgaagagcttcatt**

MM cccctgaaaatccgaatgcattatggacatccagatgtatgttgcaggttttggttct  
Event1 -----  
Event2 cccctgaaaatccgaatgcattatgga-----  
Event3 -----  
Event4 -----  
Event5 **atTTTTcatcagatacaaaaatttctctgcattgtggatctTTTTtgcccttctgagcccc**

MM aactaggggaggaataagcaaggcatctaaagtgatcaacatcagcgaggacatttttgc  
Event1 -----  
Event2 -----  
Event3 -----  
Event4 -----  
Event5 **atatatctgacaagctaccacatatgtgaatttcattaaagcagtcaccatactcgtggcc**

MM tggcttcaactgtacattacgaggtggcaatgtcactcaccatgagtatatacaagttgg  
Event1 -----  
Event2 -----  
Event3 -----  
Event4 -----  
Event5 **tttaacaacatactcactgaactgtcagctctactcaacctctcgaagactgagatct**

MM caaaggaagggatgttgggttgaatcagatatctatgtttgaag**sgRNA7→**ccaaggttgccagttg  
Event1 -----  
Event2 -----  
Event3 -----  
Event4 -----  
Event5 **ttctgaaacttaaacaccaatgctatcatcatgcctcatagaa-ccaag-tt-cca**ctga

**PAM**

MM caatgggagaacaagttccttagcagagatgtctataggttgggtcataggctggatttctt  
Event1 caatgggagaacaagttccttagcagagatgtctataggttgggtcataggctggatttctt  
Event2 -----  
Event3 --atggagaacaagttccttagcagagatgtctataggttgggtcataggctggatttctt  
Event4 caatgggagaacaagttccttagcagagatgtctataggttgggtcataggctggatttctt  
Event5 caatgggagaacaagttccttagcagagatgtctataggttgggtcataggctggatttctt

MM cagaatgctttctttcttttatacaactgtaggattcttcttcaatacaatgatgattgt  
Event1 cagaatgctttctttcttttatacaactgtaggattcttcttcaatacaatgatgattgt  
Event2 ----tgctttctttcttttatacaactgtaggattcttcttcaatacaatgatgattgt  
Event3 cagaatgctttctttcttttatacaactgtaggattcttcttcaatacaatgatgattgt  
Event4 cagaatgctttctttcttttatacaactgtaggattcttcttcaatacaatgatgattgt  
Event5 cagaatgctttctttcttttatacaactgtaggattcttcttcaatacaatgatgattgt

**←Rv4230**

MM cctcactgtatatgcattccttatggggacgactttacctggcacttagtgggg  
Event1 cctcactgtatatgcattccttatggggacgactttacctggcacttagtgggg  
Event2 cctcactgtatatgcattccttatggggacgactttacctggcacttagtgggg  
Event3 cctcactgtatatgcattccttatggggacgactttacctggcacttagtgggg  
Event4 cctcactgtatatgcattccttatggggacgactttacctggcacttagtgggg  
Event5 cctcactgtatatgcattccttatggggacgactttacctggcacttagtgggg

### B Inversion of sequence between sgRNA8 and sgRNA7 in PMR4 CRISPR event 5

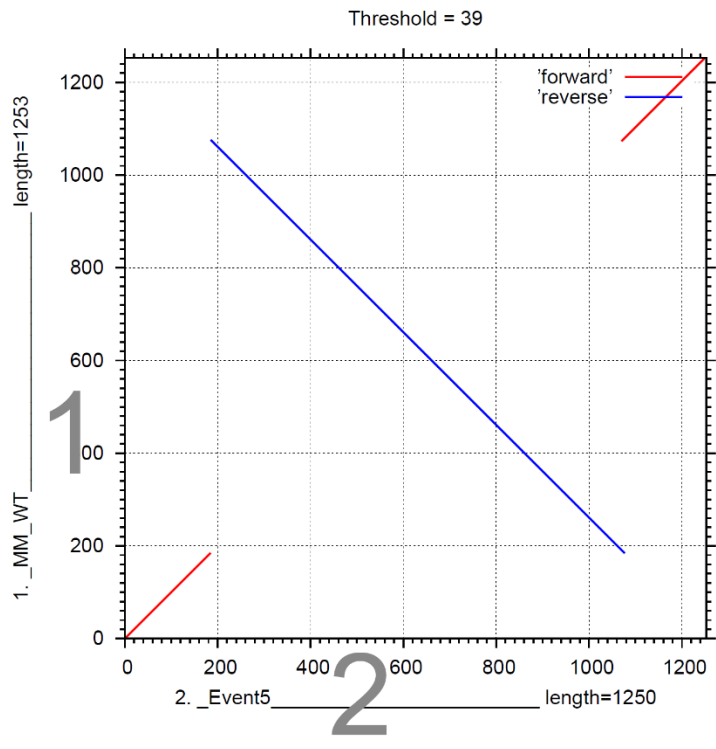

Supplement: 12870_2020_2497_MOESM1_ESM.pdf [file 12870_2020_2497_MOESM1_ESM.pdf]
